# Supplementary material for: Evolution of selenophosphate synthetases: emergence and relocation of function through independent duplications and recurrent subfunctionalization
Source: PubMed Central journal article supplement (PMC4561486; doi:10.1101/gr.190538.115), 2015-09

## Supplementary Material S4:

# Alternative isoforms sorted by gene duplication in ascidians

In our annotation of metazoan *SPS* genes we ran into an interesting case in tunicates, that constitute the most closely related outgroup to vertebrates (Delsuc 2006).

In the genome of *Ciona intestinalis*, we initially identified a single *SPS* gene, with glycine (Gly) aligned to Sec position. Later, we found that this gene actually produces two alternative forms, one with selenocysteine and one with glycine. The two forms differ only by the two first exons, and they are both supported by EST data (see figure SM4.1). Both include the same SECIS element in the 3'UTR.

Both alternative forms were found conserved in *Ciona savignyi*. In this genome assembly though, we see a single base insertion in the coding sequence, near the N-terminal, which, if real, would produce a frameshift. Nonetheless, we believe this to be artifactual, given the conservation in the rest of the region. Here we show the N-term portion of the alignment between *SPS-Gly* form of *C.intestinalis* (Query) and the corresponding genomic region in *C.savignyi* (Target); the glycine aligned to the Sec site is displayed in red.

```
Query  MALRPFKDPQSHNLDKKFRLTKYTG <---Intron---> LHGGGCKVPN ! FRAME ! DVLVKLLQELGANPYHDEQYMGGMIMPRLG <---Int
|||||  |||||  |||||  |||||  |||||  < 58nt > |||||  |||||  |||||  |||||  |||||  < 93
Target MALRPFKDPETHGLNKKFRLTKYTG LHGGGCKVPN ! SHIFT ! DVLVKLLHELGSNQYHDEQYIGGMIMPRLG
agcacatgcgcagcaaatccaatag         cccggtagca        ggtgatcccgctactcggctaggaacctg
tctgcatacacagtaaatgtcaac         gtaggggatca        atttattaatgcaaaaaaaaatggtttcgt
gtagagttaaattgcaatagagtt         gacatttagct        tcgtagctattatgtctagtcccagagaca
```

```
Query  ron---> IGLDCCVIPLRFGLSLLQTDDFFYPLIDDPYMM <---Intron---> GKIACANVLSDL YAIGVTECDNMLMLLGVSSKFTEKERD TVI
nt      > |||||  |||||  |||||  |||||  |||||  < 71nt > |||||  |||||  |||||  |||||  |||||  ...
Target  IGLDCCVIPLRFGLSLLQTDDFFYPLIDDPYMM GKIACANVLSDL YAVGVTECDNMLMLLGVSSKFTEKERD TVI ...
ag      agcgttgaccctggctcccaagtttccaggctaa         gaagtgagttagttggggagtgaacaccggatatagagagaga
        gtagtaggttctgtggtcttaccattactttaacatt         gatcgcatggatgactgtcagaatTTTTGTGcatcaaagactt
        cccgtctcattgtaccactgattctttattctgtgg         tatttctgtttgatgaaacctgtgttcctcaccaaaacct
```

Below, the N-term portion of the alignment between the other form (*SPS<sub>sec</sub>*) of *C.intestinalis* (Query) and the same genomic region in *C.savignyi* (Target) is shown. Notice that the two last exons shown (as well as the rest of the gene structure downstream, omitted here) are identical in the alignments above and below.

```
Query  KWDPVVHELSEEFRLTNFTGLKGUGCKVPQKVLLKLEGLEALS--NGFQNGQLQPTPTVG <---Intron---> IGLDCCVIPLRFGLSLLQTDDF
|||||  |||||  |||||  |||||  |||||  < 520nt > |||||  |||||  |||||  |||||  |||||  ...
Target  KWDPVHFLQEDEFRLTNFTGLKGUGCKVPQKVLLKLEGFESVSNNGFNHNNMQPTPTVG IGLDCCVIPLRFGLSLLQTDDF
atgctgctccgggtataatagtagttagcagccaccgggtgtagagtcacaaaccacagg         agcgttgaccctggctcccaagt
agacttagtaaatgtcatcgtaggggatcaatttatttagtactcagagtaaaataccct         gtgtaggttctgtggtcttaccat
ggcgtctgcaggcgaaccttaagagcggcggctggatattctatgcctccgaacct         cccgtctcattgtaccactgattc
```

```
Query  FYPLIDDPYMM <---Intron---> GKIACANVLSDL YAIGVTECDNMLMLLGVSSKFTEKERD TVI
|||||  |||||  |||||  |||||  |||||  < 71nt > |||||  |||||  |||||  |||||  |||||  ...
Target  FYPLIDDPYMM GKIACANVLSDL YAVGVTECDNMLMLLGVSSKFTEKERD TVI ...
ttccaggctaa         gaagtgagttagttggggagtgaacaccggatatagagagaga
tacttaacatt         gatcgcatggatgactgtcagaatTTTTGTGcatcaaagactt
tttattctgtg         tatttctgtttgatgaaacctgtgttcctcaccaaaacct
```



## Phylogeny of Selenophosphate synthetases (SPS)

Query VLSDLYAIGVTECDNMLMLLGVSSKFTEKERDVIPLMIHGFKDSAEAEAGTSINGGQTVLNPWCLIGGVATTVCQQNEFIMPDNAVPGDVLVLTPLGTQ  
 Target VLSDLYAMGVTECDNMLMLLGLSSKFTEEERDVVPMIIGFRDLAVEAGTNVTGGQTVINPWCLIGGVATSVCCQNEFIMPDQAVVGDVLVLTPLGTQ  
 gcagctgaggagtgaaatccgtatataggcggggcaaacgtagcgggggaagaggcagaacttcaggggatgtccagtaacgsgggggcgcaactgac  
 ttgatactgtcagaatTTTTGTGTCATCAAGATTTCTTTAGTGATCTACGCATCGGACTTACGGTGGTCCCTGAAAATTTCAACTTGATTTCACTGCA  
 gtcttctgctgactcgggatagtagtgaaacctagtggaacacctaatcgtacgtagttctgtgtatgggtataaacctgttaacctatggtataaga

Query VACNSHQWLEQRNDKNRIKLVVSEDEVEKAYHDAMFNMARLNRTAAQLMHTFNHSHGATDVTGFGILGHAANLAKQQRSEVNFVIHNLPCIAKMAAIAKA  
 Target PAVNAFQWMNQHNRIKHVISAEDTIKAYSDAILHMSRLNRHAARLHMVFQAHAATDVTGFGILGHAENLAKQQRNEVTFAIHNLPVISKMAAVSRA  
 cggagtcctaacacacacgatagggaaagtaggatcatcacccggacacgctcgggaggagtgatgcggatgaccaggatgacatcgataagggagc  
 cctactagtaaaaaagagtaattccaactacagacttatcgtagaccgttattacacccatcgtgttgacaatcaagaatccttaattcctcatcctggc  
 gtccgtaggtagtatgtatgcttggatagaccctcatggaactcggaggcataccgtctaatccagactgtagagatcagtcctctgggagaggcgcat

Query CGNMFGLLQGTSAETSGLLIICLPREQAQKFCAEIKKVEGNQAWIIGIVEAGNRTARIEKPRVIEV  
 Target SIVNFGLLKGTSAETSGLLIIVLSREQATKYCQMIATEGHQAWIIGVVEKGDARSARIIGRPRIIEV  
 aagatgtcagatggatggccagctcgcgaattccaagagccgtaagggaggatgcaagacaaagg  
 gttatgtagccaccggTTTTTCGAACCAAGAATCCAGAACGTTGTTAAGAGCCGTTGGCGTTAT  
 ccctcaggaatccgatctgacaccagatcgccgagcccaacgggtcgtaaacgtcatccggataac

In (Turon 2004), a phylogeny of ascidians is reported. *Halocynthia roretzi* and *Botryllus schlosseri* are in two sister lineages (Styelidae and Pyuridae). *Molgula tectiformis* is not among the specimen analyzed in this paper. This species is classified under the Molgulidae lineage, which together with Styelidae and Pyuridae constitute the order of Stolidobranchiata (NCBI taxonomy). *Ciona* is basal to all others mentioned Ascidia, within the Enterogona order. Finally, *Oikopleura dioica* is a tunicate, but not ascidian, and thus constitutes our outgroup.

Altogether, we think the data clearly strongly support the following gene history (see Figure 5 in main paper).

At the root of tunicates, a single *SPS* gene with selenocysteine was present (*SPS2*) -- as we observe in extant *O.dioica*. Presumably at the root of Ascidians, the same gene originated a secondary isoform with glycine aligned to selenocysteine, as we found today in *Ciona* and in *M.tectiformis* (*SPS-ae* gene). At the root of Styelidae and Pyuridae, the selenocysteine isoform retrotransposed to the genome, generating a functional, intronless copy of *SPS-Sec*.

The parental gene then lost its *SPS-Sec* isoform, thus specializing only in the *SPS-Gly* isoform. As result, the SECIS downstream of the parental gene (*SPS-Gly*) degenerated, while it was kept in the new *SPS-Sec* gene. This gene duplication is observed in species *H.roretzi* and *B.schlosseri*.

## Figures in Supplementary Material S4:

Figure SM4.1: (next page)

Snapshot of the UCSC genome browser of the *Ciona intestinalis* genome at the *SPS* gene locus. The exonic structure of the coding sequence of the two isoforms is shown on top, in blue. The gene is on the negative strand, thus it is to be read from the right to the left. The two forms differ only for the first exons (top right). Just below, the localization of the SECIS element is shown as a black rectangle. Below, the aligned EST sequences available at the genome browser are shown. ESTs support the two isoforms, and show that both share the same 3' UTR and thus the SECIS, although this is expected useless for the Gly form. For full readability download this from [big.crg.cat/SPS](http://big.crg.cat/SPS) and visualize on screen.

# Phylogeny of Selenophosphate synthetases (SPS)

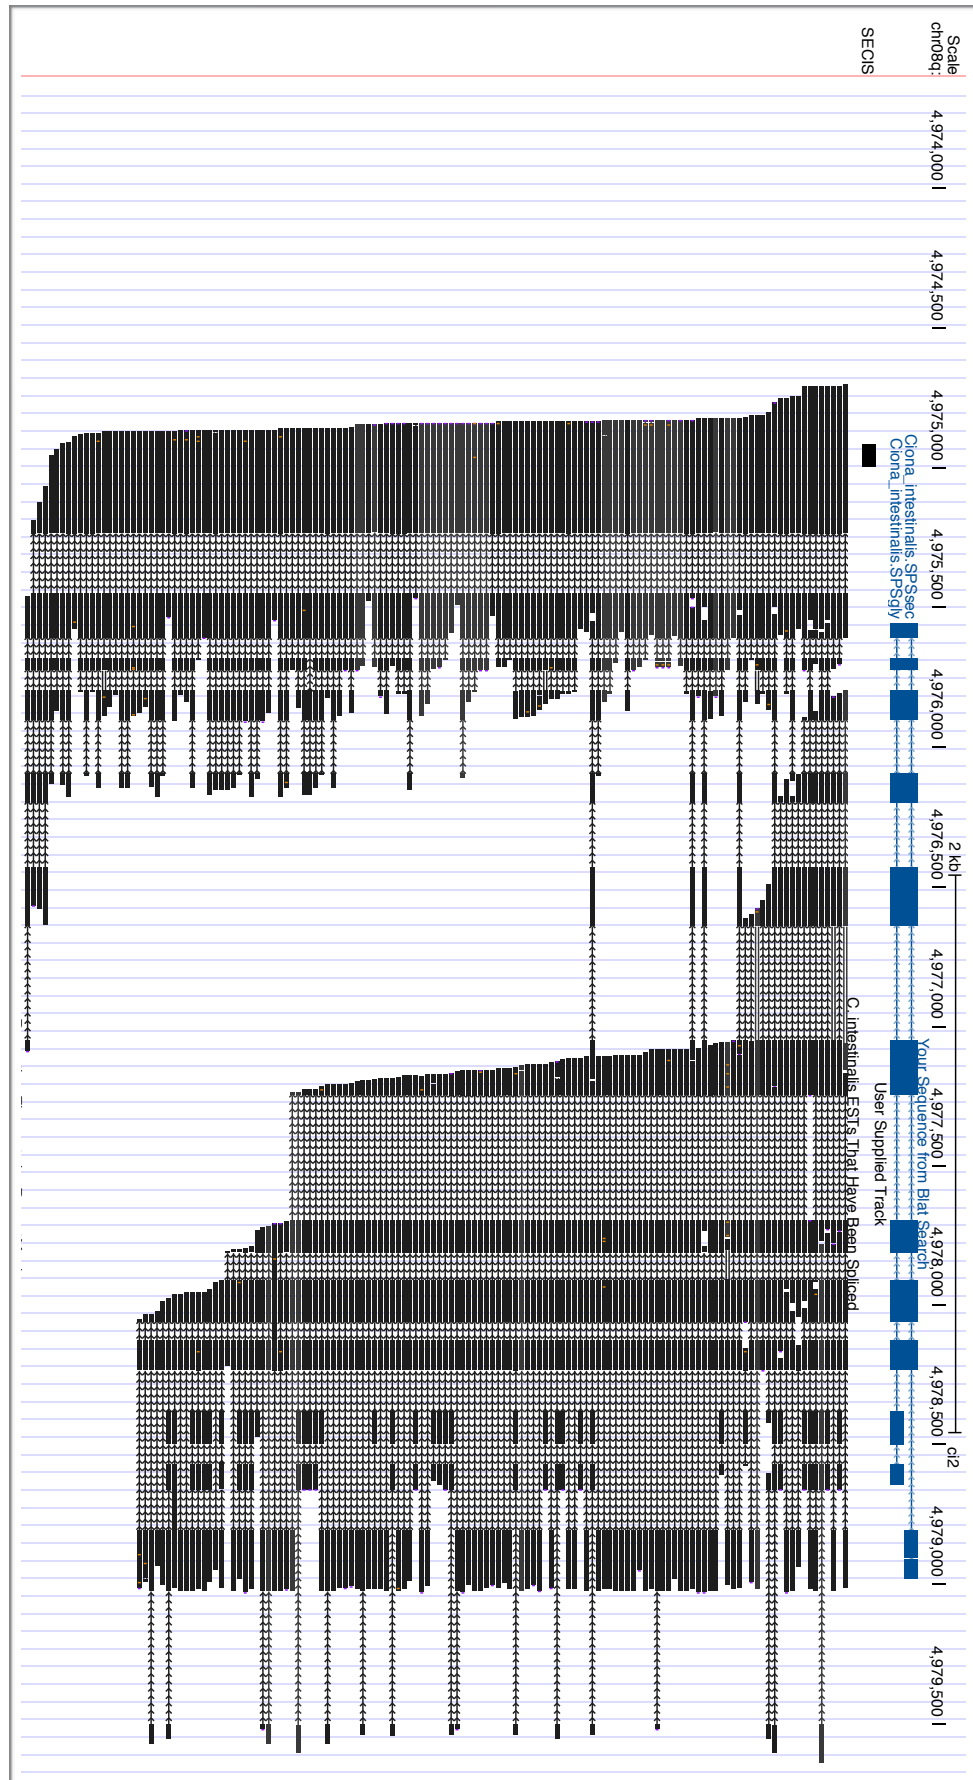

Phylogeny of Selenophosphate synthetases (SPS)

Figure SM4.2:

Alignment of SPS genes predicted with selenoprofiles on tunicate ESTs downloaded from NCBI, excluding the *Ciona* genus. The column with selenocysteine is framed in red. On the left, the protein ids assigned by Selenoprofiles allow to identify the target species. The id also contains a label after the amino acid found at the Sec column. In some cases, the label is instead "pseudo", when stop codons or frameshifts are predicted. Given the high level of gene conservation, those are probably caused just by the low quality of some ESTs. For full readability download this from [big.crg.cat/SPS](http://big.crg.cat/SPS) and visualize on screen.

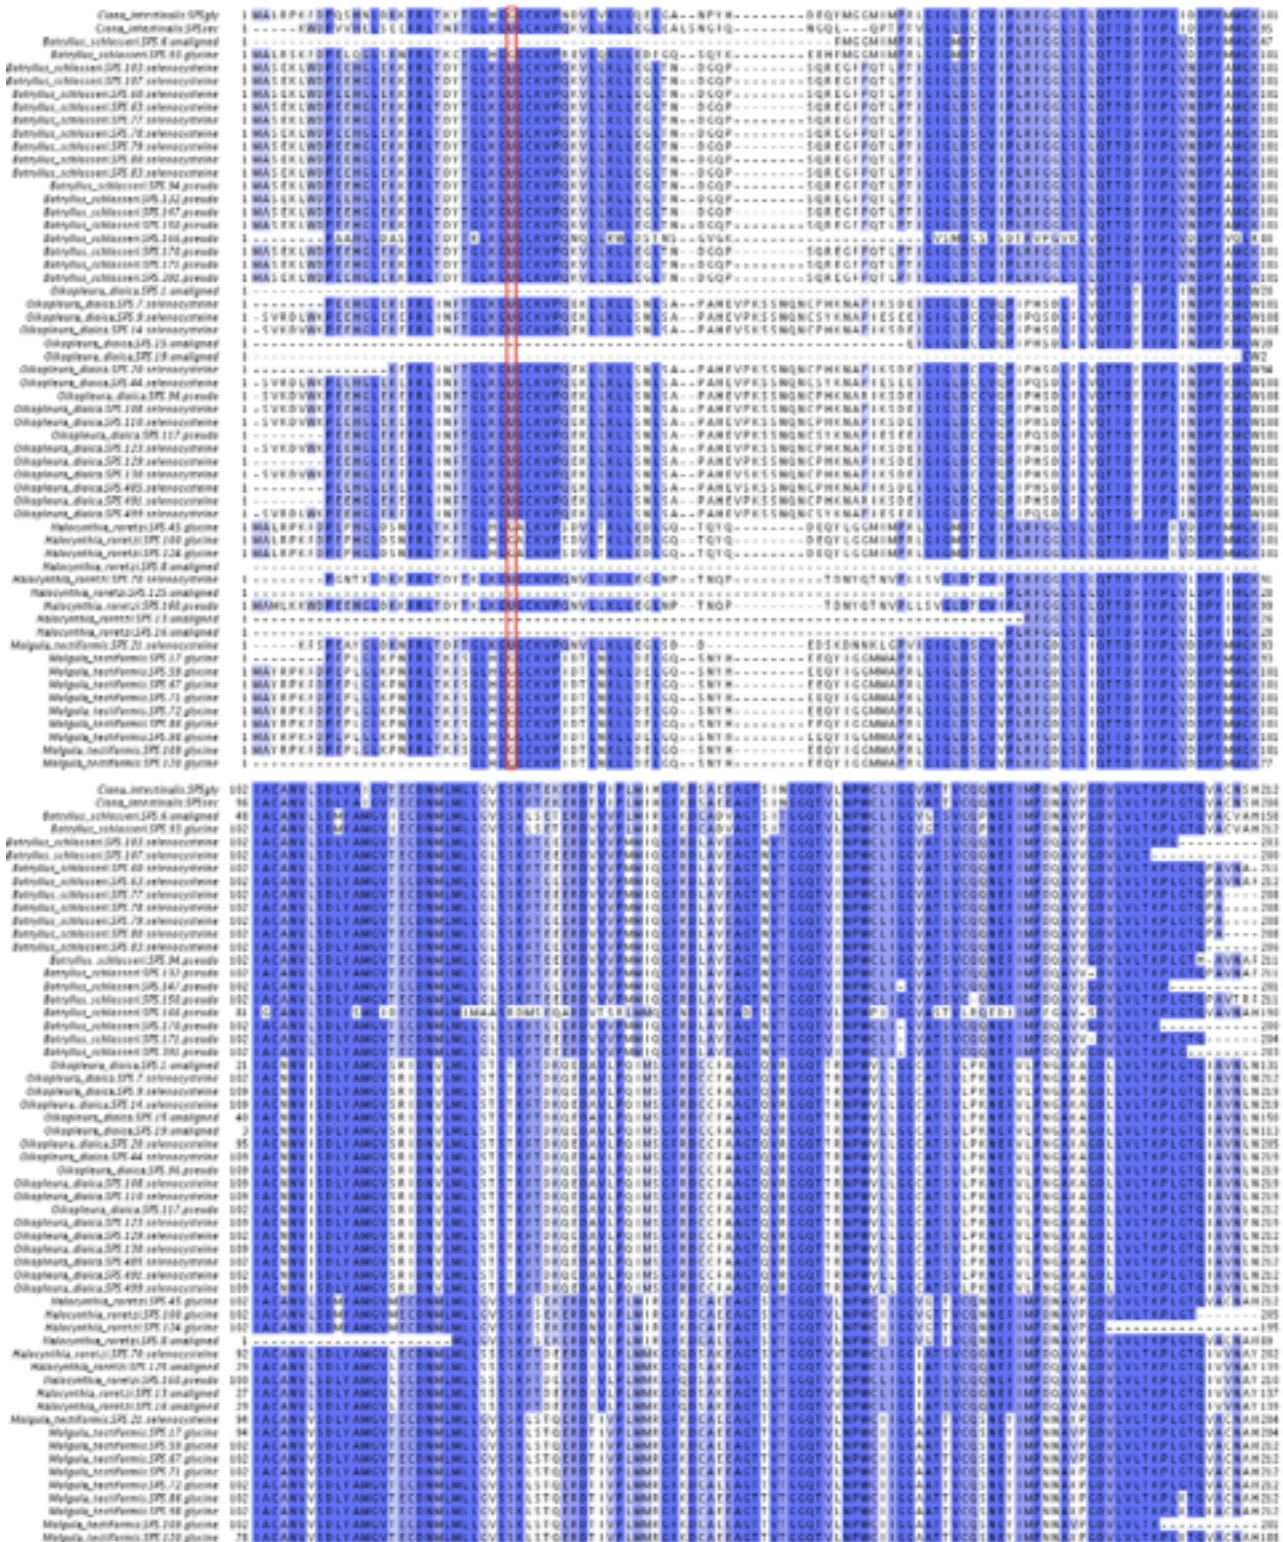

Supplement: supp_gr.190538.115_Supplemental_Material_S4.pdf [file supp_gr.190538.115_Supplemental_Material_S4.pdf]
